# Supplementary material for: Automating the assessment of door-to-imaging time in stroke management using a clinical data warehouse
Source: Research Square preprint supplement (doi:10.21203/rs.3.rs-7538212/v1), 2025-10-10

## Supplementary material

### Appendix A: CDW detailed inclusion flowchart

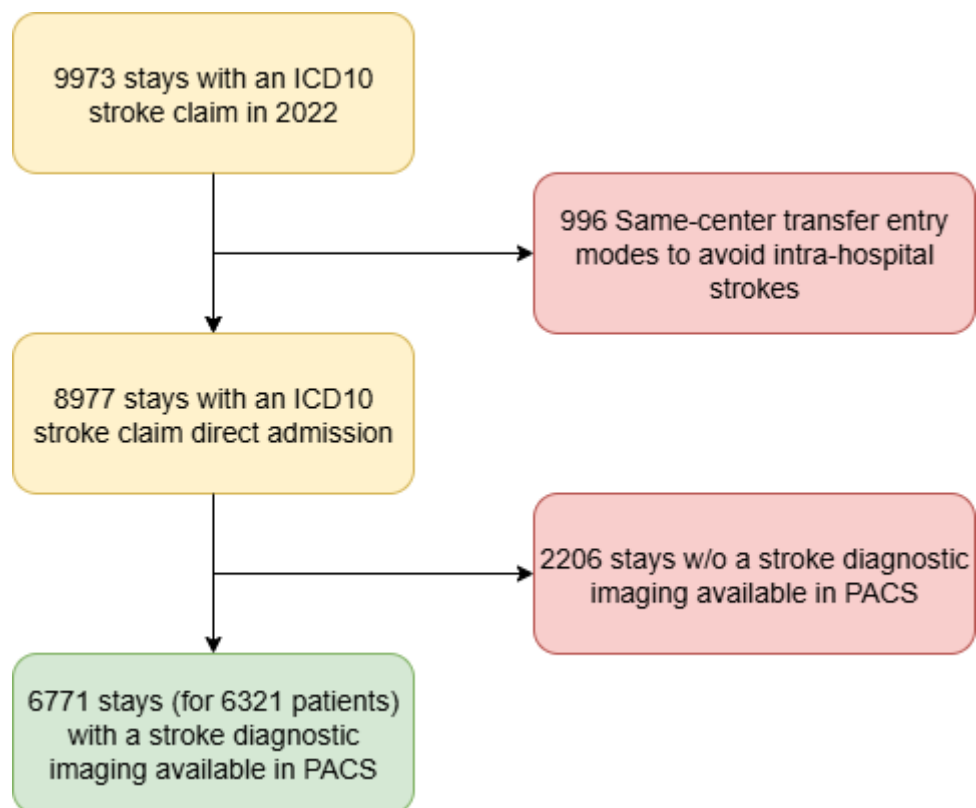

## Appendix B: 2022 French national QSI detailed inclusion flowchart

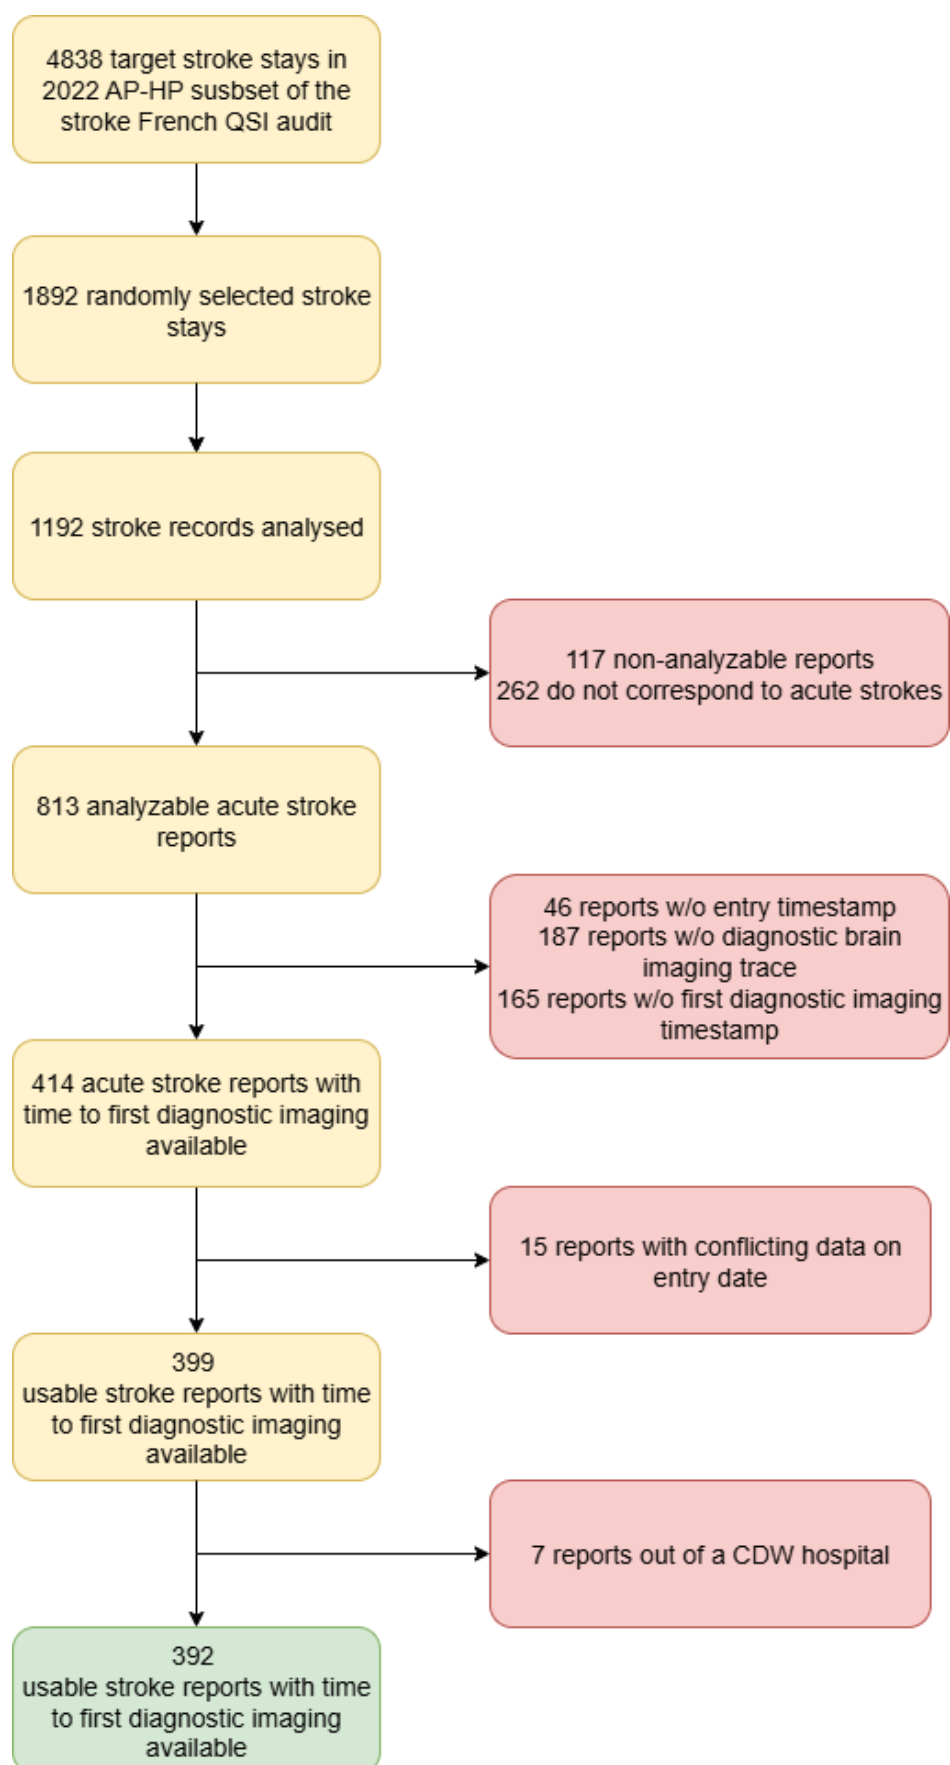

Appendix C: annotation campaign of the imaging clinical notes linked to DICOM metadata

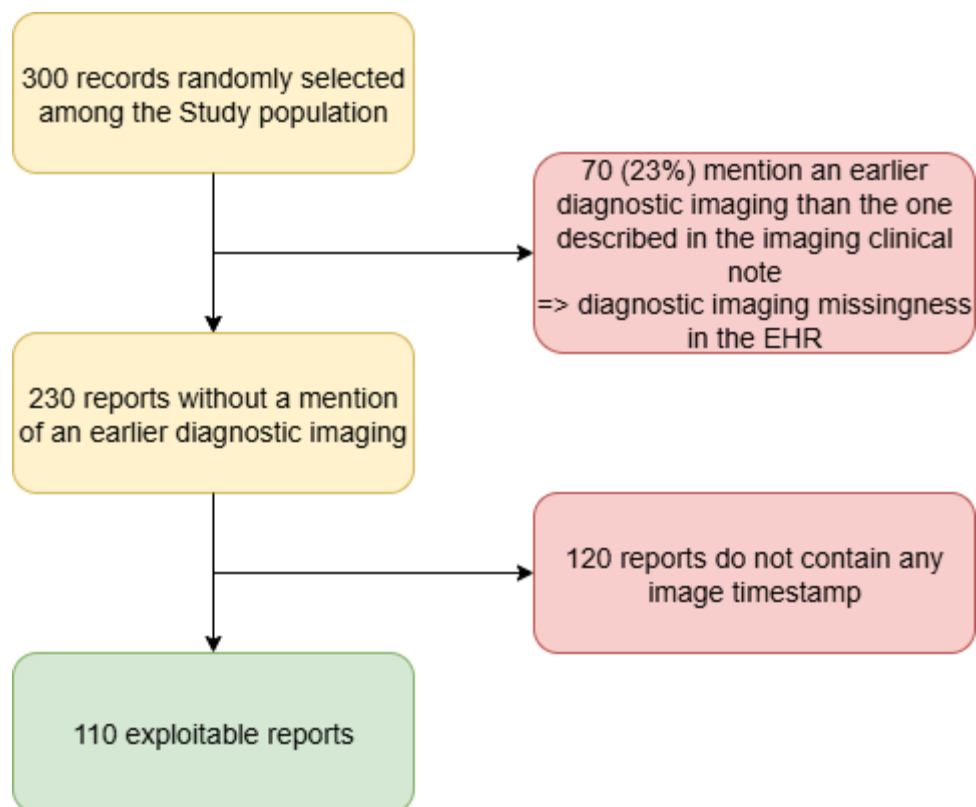

Appendix D: complete Bland Altman diagram for evaluating the DTI time agreement between manual EHR review and CDW method

DTI time difference between EHR manual review and CDW method

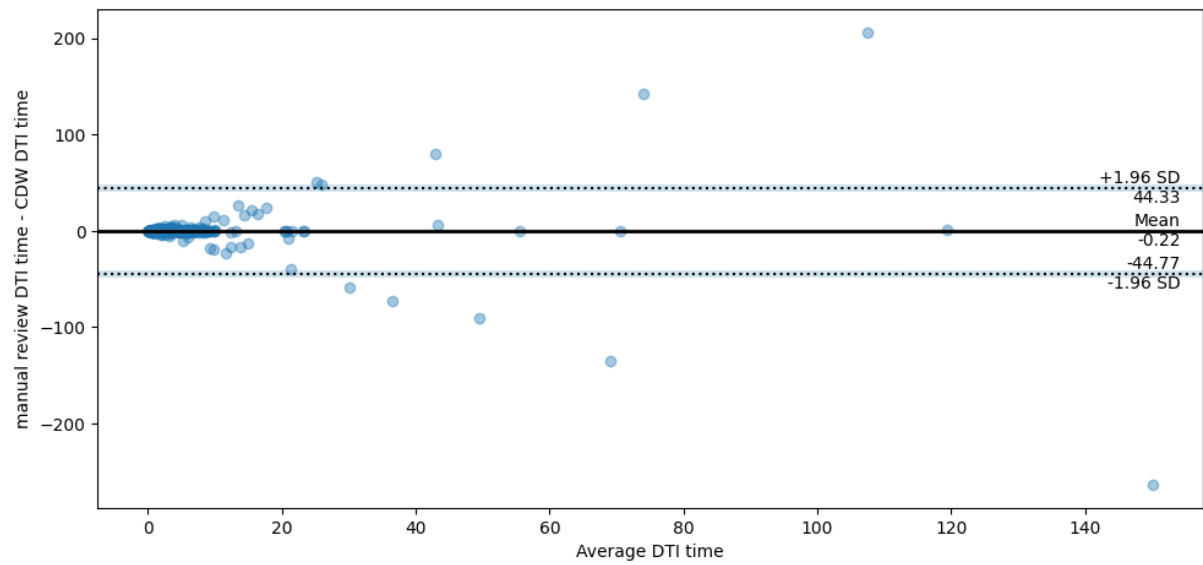

Supplement: Supplementary file 1 [file ebc97e0ac92a518f93b9ecd0.pdf]
